# Supplementary material for: From population connectivity to the art of striping Russian dolls: the lessons from Pocillopora corals
Source: PubMed Central journal article supplement (PMC5773318; doi:10.1002/ece3.3747), 2017-12-27
Supplement: ECE3-8-1411-s001.pdf [file ECE3-8-1411-s001.pdf]

**Appendix S1.** Summary statistics of the 13 microsatellite loci used to genotype *Pocillopora* colonies assigned to PHS09 (*sensu* G  lin et al., 2017b). The number of alleles per locus (*Na*) and the number of private alleles per locus (*Np*) for the three SSHs (SSH09a, SSH09b and SSH09c) are given. The total number of alleles (Total) and the mean number of alleles per locus and standard error (Mean  $\pm$  se) are also indicated for each SSH.

| Locus                           | <i>Na</i><br>(SSH09a)              | <i>Np</i><br>(SSH09a)             | <i>Na</i><br>(SSH09b)              | <i>Np</i><br>(SSH09b)             | <i>Na</i><br>(SSH09c)              | <i>Np</i><br>(SSH09c)             | Source                       |
|---------------------------------|------------------------------------|-----------------------------------|------------------------------------|-----------------------------------|------------------------------------|-----------------------------------|------------------------------|
| <b>Pd2-001</b>                  | 12                                 | 1                                 | 9                                  | 0                                 | 13                                 | 3                                 | Starger <i>et al.</i> (2007) |
| <b>Pd3-004</b>                  | 12                                 | 1                                 | 14                                 | 1                                 | 17                                 | 3                                 | Starger <i>et al.</i> (2007) |
| <b>Pd3-005</b>                  | 19                                 | 0                                 | 18                                 | 4                                 | 20                                 | 2                                 | Starger <i>et al.</i> (2007) |
| <b>Pd2-006</b>                  | 13                                 | 0                                 | 16                                 | 5                                 | 11                                 | 1                                 | Starger <i>et al.</i> (2007) |
| <b>Pd3-008</b>                  | 9                                  | 1                                 | 8                                  | 2                                 | 6                                  | 0                                 | Starger <i>et al.</i> (2007) |
| <b>Pd3-009</b>                  | 12                                 | 2                                 | 12                                 | 2                                 | 10                                 | 0                                 | Starger <i>et al.</i> (2007) |
| <b>Poc40</b>                    | 8                                  | 0                                 | 13                                 | 3                                 | 10                                 | 1                                 | Pinz  n & LaJeunesse (2011)  |
| <b>PV2</b>                      | 13                                 | 4                                 | 8                                  | 2                                 | 11                                 | 2                                 | Magalon <i>et al.</i> (2004) |
| <b>PV7</b>                      | 13                                 | 1                                 | 14                                 | 1                                 | 15                                 | 2                                 | Magalon <i>et al.</i> (2004) |
| <b>Pd4</b>                      | 21                                 | 4                                 | 12                                 | 1                                 | 13                                 | 2                                 | Torda <i>et al.</i> (2013)   |
| <b>Pd11</b>                     | 19                                 | 3                                 | 14                                 | 1                                 | 16                                 | 0                                 | Torda <i>et al.</i> (2013)   |
| <b>Pd13</b>                     | 22                                 | 4                                 | 15                                 | 2                                 | 21                                 | 3                                 | Torda <i>et al.</i> (2013)   |
| <b>Pd3-EF65</b>                 | 15                                 | 1                                 | 16                                 | 0                                 | 16                                 | 0                                 | Gorospe & Karl (2013)        |
| <b>Total</b>                    | <b>189</b>                         | <b>22</b>                         | <b>169</b>                         | <b>24</b>                         | <b>179</b>                         | <b>19</b>                         |                              |
| <b>Mean <math>\pm</math> se</b> | <b>14.54 <math>\pm</math> 1.27</b> | <b>1.69 <math>\pm</math> 0.43</b> | <b>13.00 <math>\pm</math> 0.87</b> | <b>1.85 <math>\pm</math> 0.41</b> | <b>13.77 <math>\pm</math> 1.18</b> | <b>1.46 <math>\pm</math> 0.33</b> |                              |
