# Supplementary material for: From population connectivity to the art of striping Russian dolls: the lessons from Pocillopora corals
Source: PubMed Central journal article supplement (PMC5773318; doi:10.1002/ece3.3747), 2017-12-27

**Appendix S3.** Distribution of the allelic frequencies for SSH09a. (a) Allelic frequencies for each locus for the three identified clusters (SSH09a-1, SSH09a-2, SSH09a-3) and (b) Weir and Cockerham (1984)  $F_{ST}$  estimated per locus over all SSH09a colonies.

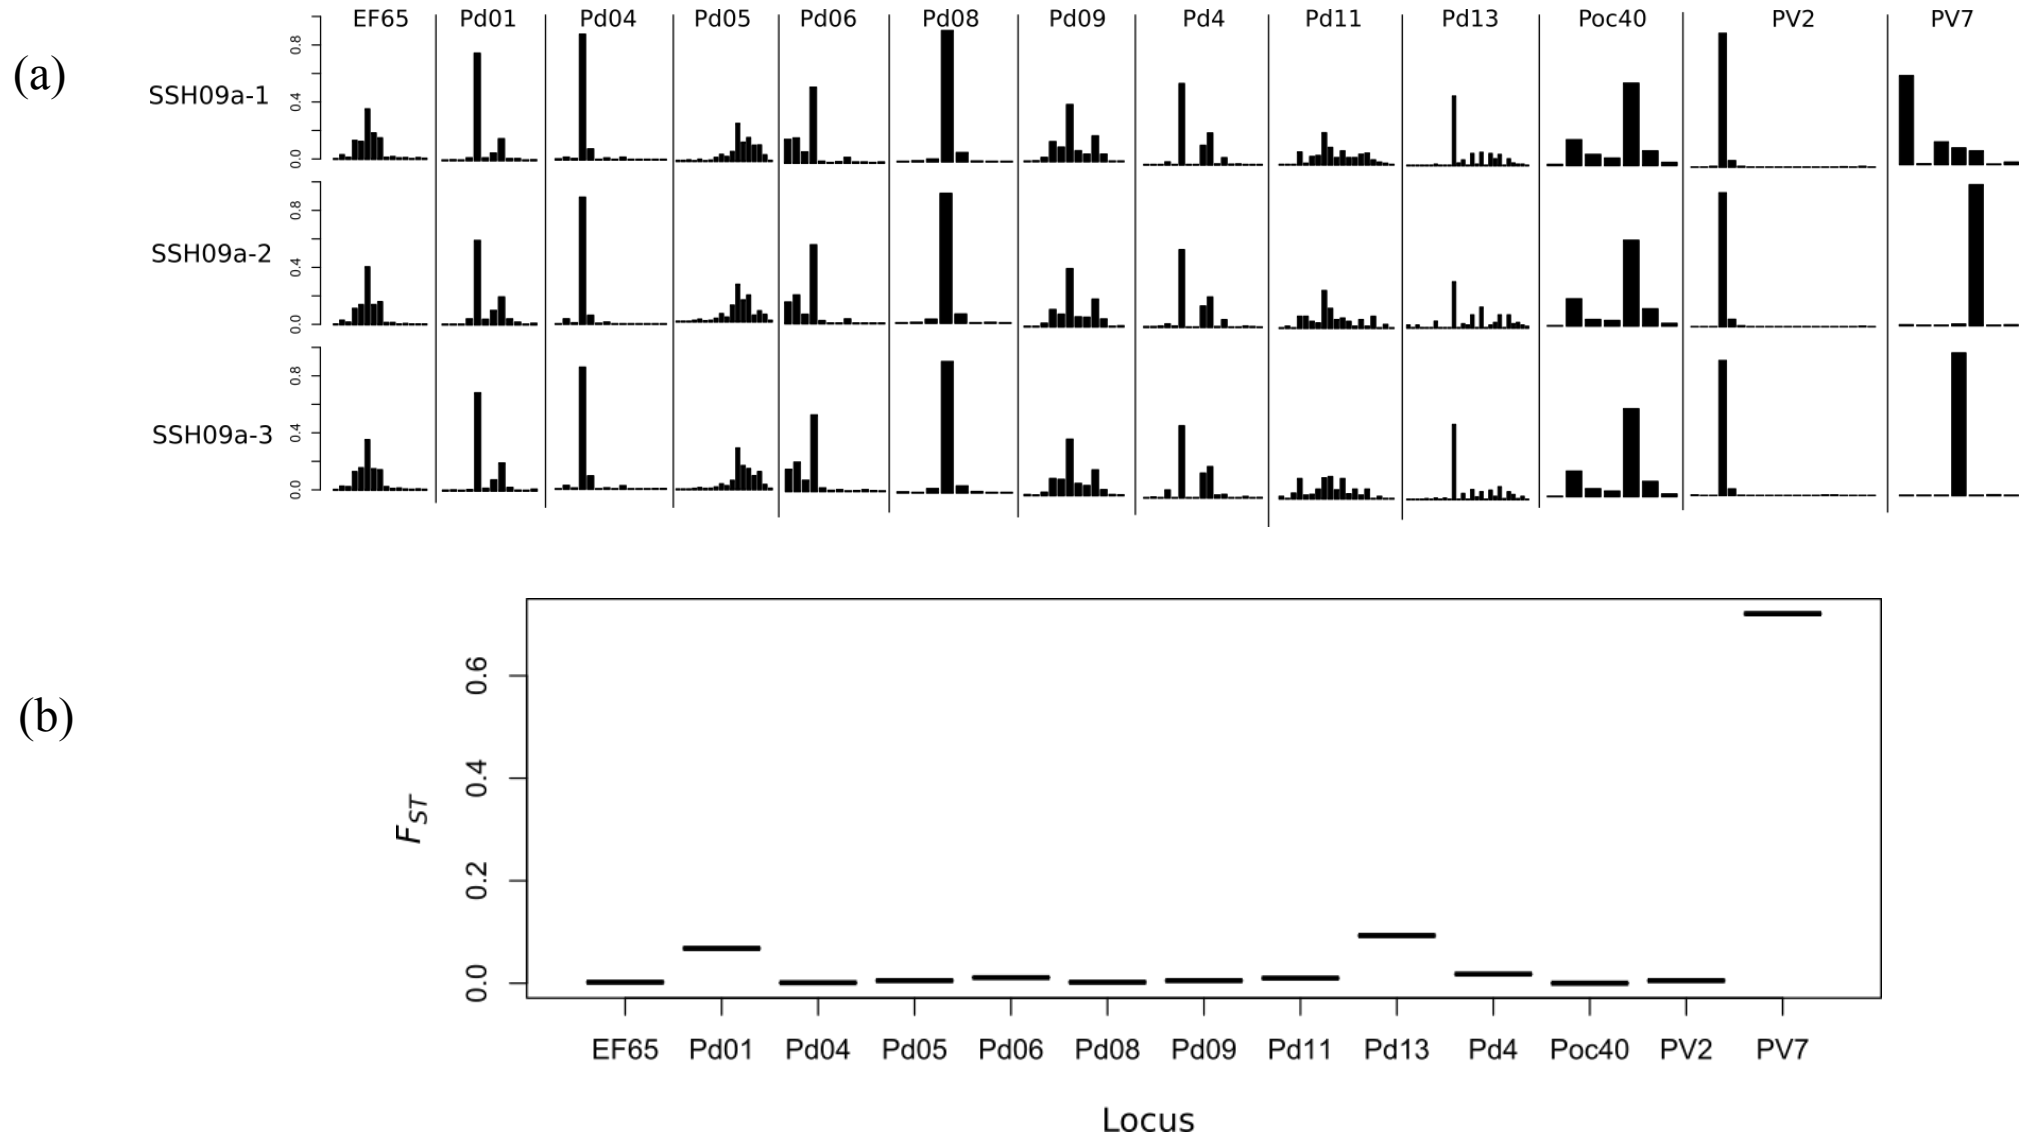

Supplement: ECE3-8-1411-s003.pdf [file ECE3-8-1411-s003.pdf]
