# Supplementary material for: From population connectivity to the art of striping Russian dolls: the lessons from Pocillopora corals
Source: Ecol Evol. 2017 Dec 27;8(2):1411–26. doi: 10.1002/ece3.3747 (PMC5773318; doi:10.1002/ece3.3747)
Supplement: Supplementary file 6 [file ECE3-8-1411-s006.pdf]

**Appendix S6.** Analyses of molecular variance (AMOVA) of PSH09 colonies grouped according to the three SSHs identified and the corresponding clusters for each SSH. d.f.: degrees of freedom

| Source of variation        | d.f. | % of variation | <i>P</i> |
|----------------------------|------|----------------|----------|
| Among SSHs                 | 2    | 14.94          | < 0.0001 |
| Among clusters within SSHs | 5    | 12.16          | < 0.0001 |
| Among clusters             | 3789 | 72.91          | < 0.0001 |
